# Supplementary material
Source: publisher figshare collection journal article supplement (https://acs.figshare.com/ndownloader/files/4634263)
Supplement: Supplementary file 1 [file 4634263]

## ***Supporting Information***

### **Zwitterionic Salts as Mild Organocatalysts for Transesterification**

Kazuaki Ishihara,\* Masatoshi Niwa, and Yuji Kosugi

*Graduate School of Engineering, Nagoya University, Furo-cho, Chikusa, Nagoya 464-8603, Japan*

E-mail: [ishihara@cc.nagoya-u.ac.jp](mailto:ishihara@cc.nagoya-u.ac.jp)

#### **Table of Contents**

|                                                    |           |
|----------------------------------------------------|-----------|
| <b>Experimental Procedures and Analytical Data</b> | <b>S2</b> |
|----------------------------------------------------|-----------|

#### **Appendix (<sup>1</sup>H and <sup>13</sup>C NMR spectra)**

|                   |     |
|-------------------|-----|
| Catalyst <b>1</b> | S6  |
| Ester <b>S1</b>   | S7  |
| Ester <b>S2</b>   | S8  |
| Ester <b>S3</b>   | S9  |
| Ester <b>S4</b>   | S10 |
| Ester <b>S5</b>   | S11 |
| Ester <b>S6</b>   | S12 |
| Ester <b>S7</b>   | S13 |
| Ester <b>S8</b>   | S14 |
| Ester <b>S9</b>   | S15 |
| Ester <b>S10</b>  | S16 |
| Ester <b>S11</b>  | S17 |
| Ester <b>S12</b>  | S18 |
| Ester <b>S13</b>  | S19 |
| Ester <b>S14</b>  | S20 |

**General Methods.** Infrared (IR) spectra were recorded on a JASCO FT/IR 460 plus spectrometer.  $^1\text{H}$  NMR spectra were measured on Varian Gemini-2000 (300 MHz) spectrometer at ambient temperature. Data were recorded as follows: chemical shift in ppm from internal tetramethylsilane on the  $\delta$  scale, multiplicity (s = singlet; d = doublet; t = triplet; q = quartet, m = multiplet), coupling constant (Hz), integration, and assignment.  $^{13}\text{C}$  NMR spectra were measured on Varian Gemini-2000 (75 MHz), VXR 500 (125 MHz) spectrometer. Chemical shifts were recorded in ppm from the solvent resonance employed as the internal standard (deuteriochloroform at 77.00 ppm). Melting points were determined using a Yanaco MP-J3. For thin-layer chromatography (TLC) analysis throughout this work, Merck precoated TLC plate (silica gel 60 GF254 0.25 mm) was used. The products were purified by column chromatography on silica gel (E. Merck Art. 9385). Microanalyses were performed at the Graduate School of Agriculture, Nagoya University. High resolution mass spectral analysis (HRMS) was performed at Chemical Instrument Center, Nagoya University. In experiments that required dry solvent, ether, *N,N*-dimethylformamide (DMF) and tetrahydrofuran (THF) were purchased from TCI or Wako as the “anhydrous” and stored over 4Å and 5Å molecular sieves. Benzene, hexane, toluene, and dichloromethane were freshly distilled from calcium hydride. Other simple chemicals were analytical-grade and obtained commercially.

**Preparation of (Z)-*N*-[3,5-Bis(trifluoromethyl)phenyl]-4-(pyrrolidinium-1-ylidene)pyridine-1(4H)-carbimidothioate (1) (Scheme 1).** To a solution of 3,5-Bis(trifluoromethyl)phenyl isothiocyanate (**6**) (0.92 mL, 5 mmol) in toluene (10 mL) was added PPY (0.74 g, 5 mmol) at ambient temperature. Immediately, **1** was precipitated as yellow solid. Pure **1** was obtained as yellow crystals in 92% yield by recrystallization from a hot solution of **1** in toluene.

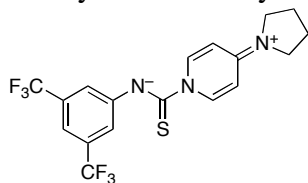

Mp. 120 °C; IR (KBr) 3448, 1641, 1567, 1541, 1508, 1376, 1164, 1119, 1082, 984  $\text{cm}^{-1}$ ;  $^1\text{H}$  NMR (a 3:2:2 equilibristic mixture of **1**, **6** and PPY,  $\text{CD}_3\text{CN}$ , 300 MHz)  $\delta$  2.05–2.09 (m, 4H), 3.52–3.56 (m, 4H), 6.67 (d, 2H,  $J = 8.0$  Hz), 7.59 (s, 1H), 7.81 (s, 2H), 9.55 (d, 2H,  $J = 8.0$  Hz);  $^{13}\text{C}$  NMR (a 3:2:2 equilibristic mixture of **1**, **6** and PPY,  $\text{CD}_3\text{CN}$ , 75 MHz)  $\delta$  25.8 (2C), 49.7 (2C), 106.9 (2C), 116.2, 123.9 (q, 2C,  $J = 270$  Hz), 124.3 (2C), 131.7 (q, 2C,  $J = 32$  Hz), 139.0 (2C), 154.9, 156.1, 172.3. Anal. Calcd for  $\text{C}_{18}\text{H}_{15}\text{F}_6\text{N}_3\text{S}$ : C, 51.55; H, 3.61; N, 10.02; S, 7.65. Found: C, 51.41; H, 3.61; N, 9.75.

**X-ray Crystallographic Analysis of 1:** The yellow solid of **1** was recrystallized from toluene to obtain a yellow crystal at room temperature. Crystal data:  $\text{C}_{18}\text{H}_{15}\text{F}_6\text{N}_3\text{S}$ ,  $M = 419.39$ , crystal dimensions  $0.30 \times 0.30 \times 0.20 \text{ mm}^3$ , monoclinic, space group  $P21/c$ ,  $a = 13.136(6)$ ,  $b = 8.069(4)$ ,  $c = 16.960(8) \text{ Å}$ ,  $V = 4368(3) \text{ Å}^3$ ,  $Z = 4$ ,  $D_c = 1.572 \text{ g/cm}^3$ ,  $\mu = 0.252 \text{ mm}^{-1}$ ,  $T = 123 \text{ K}$ . X-ray crystallographic analysis was performed with a Bruker SMART APEX diffractometer (graphite monochromator,  $\text{MoK}\alpha$  radiation,  $\lambda = 0.71073 \text{ Å}$ ). The structure was solved by direct

methods and expanded using Fourier techniques. 4407 reflections were independent and unique, and 253 with  $I > 2\sigma(I)$  ( $2\theta_{\max} = 29.21^\circ$ ) were used for the solution of the structure.  $R = 0.0588$  and  $R_w = 0.1585$ .

Crystallographic data have been deposited with the Cambridge Crystallographic Data Centre: Deposition number CCDC-673714. Copies of the data can be obtained free of charge via <http://www.ccdc.cam.ac.uk/conts/retrieving.html> (or from the Cambridge Crystallographic Data Centre, 12, Union Road, Cambridge, CB2 1EZ, UK; Fax: +44 1223 336033; e-mail: [deposit@ccdc.cam.ac.uk](mailto:deposit@ccdc.cam.ac.uk)).

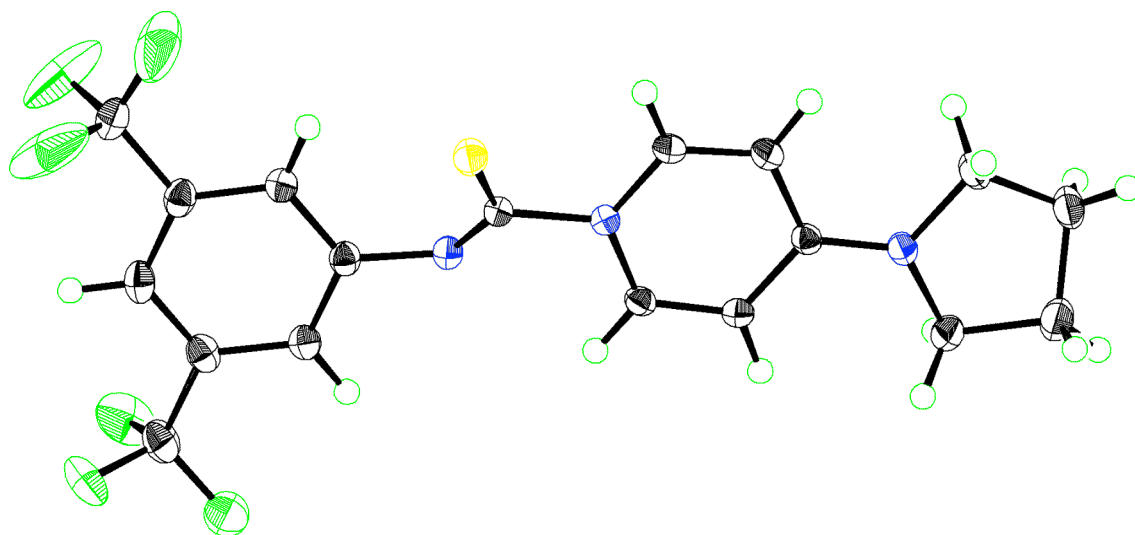

**General Procedure for the Transesterification Reaction Catalyzed by 6 and PPY (Table 4).** The reaction mixture of methyl carboxylate (5 mmol) and alcohol (5 mmol) in hydrocarbons (3 mL) was heated under azeotropic reflux conditions with the removal of methanol. Methanol was removed through a pressure-equalized addition funnel containing a cotton plug and 5 Å molecular sieves (pellets) and functioning as a Soxhlet extractor. After heating for 24 hours, the reaction mixture was allowed to cool to ambient temperature. And then, the resultant mixture was concentrated in vacuo, and the crude product was purified by column chromatography on silica gel with hexane–ethyl acetate as eluents.

Physical properties of ester products (Tables 1–4) are as follows:

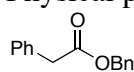 **Benzyl 2-Phenylacetate (S1) (Tables 1 and 3, commercially available):**<sup>1</sup> <sup>1</sup>H NMR (300 MHz, CDCl<sub>3</sub>) δ 3.67 (s, 2H), 5.13 (s, 2H), 7.25–7.40 (m, 10H); <sup>13</sup>C NMR (75 MHz, CDCl<sub>3</sub>) δ 40.9, 66.2, 126.8 (2C), 127.8, 127.9, 128.2 (2C), 128.3 (2C), 129.0 (2C), 133.7, 135.6, 171.0.

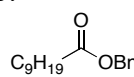 **Benzyl Decanoate (S2) (Tables 1 and 4, commercially available):**<sup>2</sup> <sup>1</sup>H NMR (CDCl<sub>3</sub>, 300 MHz) δ 0.88 (t, 3H,  $J = 6.6$  Hz), 1.20–1.40 (m, 12H), 1.58–1.70 (m, 2H), 2.35 (t, 2H,  $J = 7.5$  Hz), 5.11 (s, 2H), 7.28–7.39 (m, 5H); <sup>13</sup>C NMR (75 MHz, CDCl<sub>3</sub>) δ 13.8, 22.4, 24.6, 28.8, 29.0 (2C), 29.2, 31.6, 33.9, 65.6, 127.7, 127.8 (2C), 128.1 (2C), 136.0, 173.0.

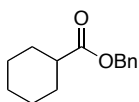

**Benzyl Cyclohexanecarboxylate (S3) (Tables 1 and 4):**<sup>3</sup> <sup>1</sup>H NMR (CDCl<sub>3</sub>, 300 MHz) δ 1.19–1.96 (m, 10H), 2.35 (tt, 1H, *J* = 3.6, 11.1 Hz), 5.11 (s, 2H), 7.29–7.40 (m, 5H); <sup>13</sup>C NMR (75 MHz, CDCl<sub>3</sub>) δ 25.0 (2C), 25.3, 28.6 (2C), 42.6, 65.3, 127.5 (2C), 127.6, 128.0 (2C), 136.0, 175.1.

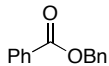

**Benzyl Benzoate (S4) (Tables 1 and 4, commercially available):**<sup>1,3,4</sup> <sup>1</sup>H NMR (300 MHz, CDCl<sub>3</sub>) δ 5.37 (s, 2H), 7.31–7.59 (m, 8H), 8.05–8.12 (m, 2H); <sup>13</sup>C NMR (75 MHz, CDCl<sub>3</sub>) δ 66.5, 128.0 (2C), 128.1, 128.2 (2C), 128.4 (2C), 129.5 (2C), 129.9, 132.9, 135.9, 166.2.

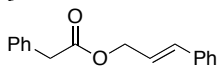

**Cinnamyl 2-Phenylacetate (S5) (Tables 2 and 4, commercially available):**<sup>5</sup> <sup>1</sup>H NMR (CDCl<sub>3</sub>, 300 MHz) δ 3.67 (s, 2H), 4.74 (dd, 2H, *J* = 1.2, 6.3 Hz), 6.24 (dt, 1H, *J* = 6.3, 15.9 Hz), 6.56 (d, 1H, *J* = 15.9 Hz), 7.22–7.38 (m, 10H); <sup>13</sup>C NMR (75 MHz, CDCl<sub>3</sub>) δ 40.9, 64.9, 122.7, 126.3 (2C), 126.8, 127.7, 128.2 (4C), 129.0 (2C), 133.6, 133.7, 135.8, 170.8.

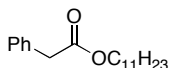

**Undecyl 2-Phenylacetate (S6) (Tables 2 and 4):** IR (film) 2925, 2854, 1738, 1496, 1455, 1254, 1158 cm<sup>-1</sup>; <sup>1</sup>H NMR (300 MHz, CDCl<sub>3</sub>) δ 0.88 (t, 3H, *J* = 6.2 Hz), 1.18–1.40 (m, 16H), 1.60 (quintet, 2H, *J* = 6.6 Hz), 3.61 (s, 2H), 4.08 (t, 2H, *J* = 6.6 Hz), 7.20–7.38 (m, 5H); <sup>13</sup>C NMR (75 MHz, CDCl<sub>3</sub>) δ 13.8, 22.4, 25.5, 28.3, 28.9, 29.1, 29.2, 29.3, 29.4, 31.6, 41.0, 64.4, 126.6, 128.1 (2C), 128.9 (2C), 133.9, 170.9. HRMS(FAB) calcd for C<sub>19</sub>H<sub>31</sub>O<sub>2</sub> [(M+H)<sup>+</sup>] 291.2324. Found: 291.2335.

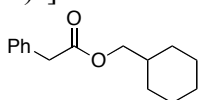

**Cyclohexylmethyl 2-Phenylacetate (S7) (Tables 2 and 4):**<sup>6</sup> <sup>1</sup>H NMR (300 MHz, CDCl<sub>3</sub>) δ 0.86–0.92 (m, 2H), 1.11–1.29 (m, 3H), 1.55–1.73 (m, 6H), 3.62 (s, 2H), 3.90 (d, 2H, *J* = 6.3 Hz); <sup>13</sup>C NMR (75 MHz, CDCl<sub>3</sub>) δ 25.5 (2C), 26.2, 29.4 (2C), 36.9, 41.3, 69.9, 126.9, 128.4 (2C), 129.1 (2C), 134.1, 171.6.

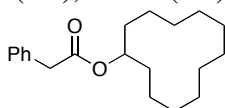

**Cyclododecyl 2-Phenylacetate (S8) (Table 2):**<sup>7</sup> <sup>1</sup>H NMR (300 MHz, CDCl<sub>3</sub>) δ 1.32–1.53 (m, 20H), 1.65–1.74 (m, 2H), 3.57 (s, 2H), 5.01 (tt, 1H, *J* = 4.8, 7.2 Hz), 7.20–7.33 (m, 5H); <sup>13</sup>C NMR (75 MHz, CDCl<sub>3</sub>) δ 20.6 (2C), 23.0 (2C), 23.2 (2C), 23.6, 23.8 (2C), 28.8 (2C), 41.5, 72.4, 126.7, 128.3 (2C), 129.0 (2C), 134.2, 171.1.

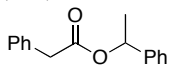

**1-Phenylethyl 2-Phenylacetate (S9) (Table 4):**<sup>8</sup> <sup>1</sup>H NMR (300 MHz, CDCl<sub>3</sub>) δ 1.51 (d, 3H, *J* = 6.6 Hz), 3.64 (s, 2H), 5.89 (q, 1H, *J* = 6.6 Hz), 7.24–7.34 (m, 10H); <sup>13</sup>C NMR (75 MHz, CDCl<sub>3</sub>) δ 22.1, 41.5, 72.6, 125.9 (2C), 126.9, 127.7, 128.3 (2C), 128.4 (2C), 129.2 (2C), 133.9, 141.4, 170.6.

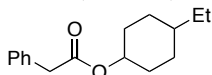

**4-Ethylcyclohexyl 2-Phenylacetate (S10) (Table 4):** IR (film) 2936, 2857, 1733, 1496, 1454, 1259, 1164, 1019 cm<sup>-1</sup>; <sup>1</sup>H NMR (CDCl<sub>3</sub>, 300 MHz) δ 0.84–1.97 (m, 14H), 3.58 and 3.61 (s, 2H, trans and cis isomers), 4.67 and 4.96–5.02 (tt and m, 1H, *J* = 4.5, 11.1 Hz, trans and cis isomers), 7.23–7.34 (m, 5H); <sup>13</sup>C NMR (75 MHz, CDCl<sub>3</sub>) δ 11.1 and 11.3 (cis and

trans isomers), 26.6 and 30.2 (2C, cis and trans isomers), 28.8, 29.2 and 31.2 (2C, cis and trans isomers), 37.7 and 38.0 (cis and trans isomers), 41.3 and 41.6 (trans and cis isomers), 70.2 and 73.7 (cis and trans isomers), 126.6, 128.1 (2C), 128.8 and 128.9 (2C, trans and cis isomers), 134.1 and 134.2 (trans and cis isomers), 170.6. HRMS(FAB) calcd for C<sub>16</sub>H<sub>23</sub>O<sub>2</sub> [(M+H)<sup>+</sup>] 247.1698. Found: 247.1696.

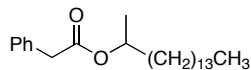

**Hexadecan-2-yl 2-Phenylacetate (S11) (Table 4):** IR (film) 2925, 2853, 1735, 1496, 1455, 1258, 1123 cm<sup>-1</sup>; <sup>1</sup>H NMR (300 MHz, CDCl<sub>3</sub>) δ 0.88 (t, 3H, *J* = 6.8 Hz), 1.13–1.59 (m, 29H), 3.59 (2, 2H), 4.90 (sextet, 1H, *J* = 6.3 Hz), 7.22–7.35 (m, 5H); <sup>13</sup>C NMR (75 MHz, CDCl<sub>3</sub>) δ 14.0, 19.8, 22.6, 25.2, 29.3–29.6 (9C), 31.8, 35.8, 41.6, 71.2, 126.8, 128.3 (2C), 129.0 (2C), 134.2, 171.0. HRMS(FAB) calcd for C<sub>24</sub>H<sub>41</sub>O<sub>2</sub> [(M+H)<sup>+</sup>] 361.3107. Found: 361.3122.

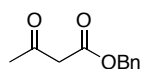

**Benzyl 3-Oxobutanoate (S12) (Table 4, commercially available):**<sup>9</sup> <sup>1</sup>H NMR (CDCl<sub>3</sub>, 300 MHz) δ 2.25 (s, 3H), 3.50 (s, 2H), 5.28 (s, 2H), 7.30–7.40 (m, 5H); <sup>13</sup>C NMR (75 MHz, CDCl<sub>3</sub>) δ 29.4, 49.2, 66.3, 127.7 (2C), 127.8 (2C), 128.0, 135.0, 166.5, 200.0.

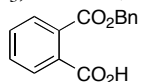

**2-(Benzyloxycarbonyl)benzoic Acid (S13) (Table 4, commercially available):**<sup>10</sup> <sup>1</sup>H NMR (CDCl<sub>3</sub>, 300 MHz) δ 5.35 (s, 2H), 7.22–7.36 (m, 3H), 7.38–7.43 (m, 2H), 7.51–7.62 (m, 2H), 7.68–7.72 (m, 1H), 7.87–7.92 (m, 1H), a proton of CO<sub>2</sub>H was not assigned; <sup>13</sup>C NMR (75 MHz, CDCl<sub>3</sub>) δ 68.4, 129.2 (2C), 129.37 (2C), 129.40, 130.0, 131.9, 132.3, 133.0, 133.6, 136.7, 169.5, 170.3.

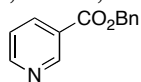

**Benzyl Nicotinate (S14) (Table 4, commercially available):**<sup>4,11</sup> <sup>1</sup>H NMR (300 MHz, CDCl<sub>3</sub>) δ 5.49 (s, 2H), 7.36–7.47 (m, 6H), 8.32 (dm, 1H, *J* = 7.8 Hz); 8.78 (dd, 1H, *J* = 1.5, 4.5 Hz); 9.27 (dd, *J* = 0.9, 2.4 Hz, 1H); <sup>13</sup>C NMR (75 MHz, CDCl<sub>3</sub>) δ 66.8, 123.0, 125.7, 128.0 (2C), 128.2, 128.4 (2C), 135.2, 136.8, 150.7, 153.2, 164.7.

## References

- (1) *Dictionary of Organic Compounds*, 4<sup>th</sup> Ed., Eyre and Spottiswoode Ltd., London, 1965.
- (2) Eliel, E.; Anderson, R. P. *J. Am. Chem. Soc.* **1952**, 74, 547–549.
- (3) Ishihara, K.; Nakayama, M.; Ohara, S.; Yamamoto, H. *Tetrahedron* **2002**, 58, 8179–8188.
- (4) Khan, K. M.; Maharvi, G. M.; Hayat, S.; Zia-Ullah, Choudhary, M. I.; Atta-ur-Rahman *Tetrahedron* **2003**, 59, 5549–5554.
- (5) Mukaiyama, T.; Toda, H.; Kobayashi, S. *Chem. Lett.* **1976**, 13–14.
- (6) Corina, D. L.; Isaac, K. *J. Chromatogr.* **1983**, 260, 51–62.
- (7) Yarchak, M. L.; Dalton, J. C.; Saunders, W. H., Jr. *J. Am. Chem. Soc.* **1973**, 95, 5228–5233.
- (8) Saigo, K.; Usui, M.; Kikuchi, K.; Shimada, E.; Mukaiyama, T. *Bull. Chem. Soc. Jpn.* **1977**, 50, 1863–1866.
- (9) Manz, O. *Justus Liebigs Ann. Chem.* **1974**, 345.
- (10) Node, M.; Nishide, K.; Sai, M.; Fuji, K.; Fujita, E. *J. Org. Chem.* **1981**, 46, 1991–1993.
- (11) Barry, J.; Bram, G.; Petit, A. *Heterocycles* **1985**, 23, 875–880.
